# Supplementary material
Source: PubMed Central journal article supplement (PMC9615940)
Supplement: NIHMS1840435-supplement-Supp_Material.pdf [file NIHMS1840435-supplement-Supp_Material.pdf]

**Supplemental information**

**Archetype tasks link intratumoral heterogeneity  
to plasticity and cancer hallmarks  
in small cell lung cancer**

**Sarah M. Groves, Geena V. Ildefonso, Caitlin O. McAtee, Patricia M.M. Ozawa, Abbie S. Ireland, Philip E. Stauffer, Perry T. Wasdin, Xiaomeng Huang, Yi Qiao, Jing Shan Lim, Jackie Bader, Qi Liu, Alan J. Simmons, Ken S. Lau, Wade T. Iams, Doug P. Hardin, Edward B. Saff, William R. Holmes, Darren R. Tyson, Christine M. Lovly, Jeffrey C. Rathmell, Gabor Marth, Julien Sage, Trudy G. Oliver, Alissa M. Weaver, and Vito Quaranta**

Figure S1: Related to Figures 1 and 2

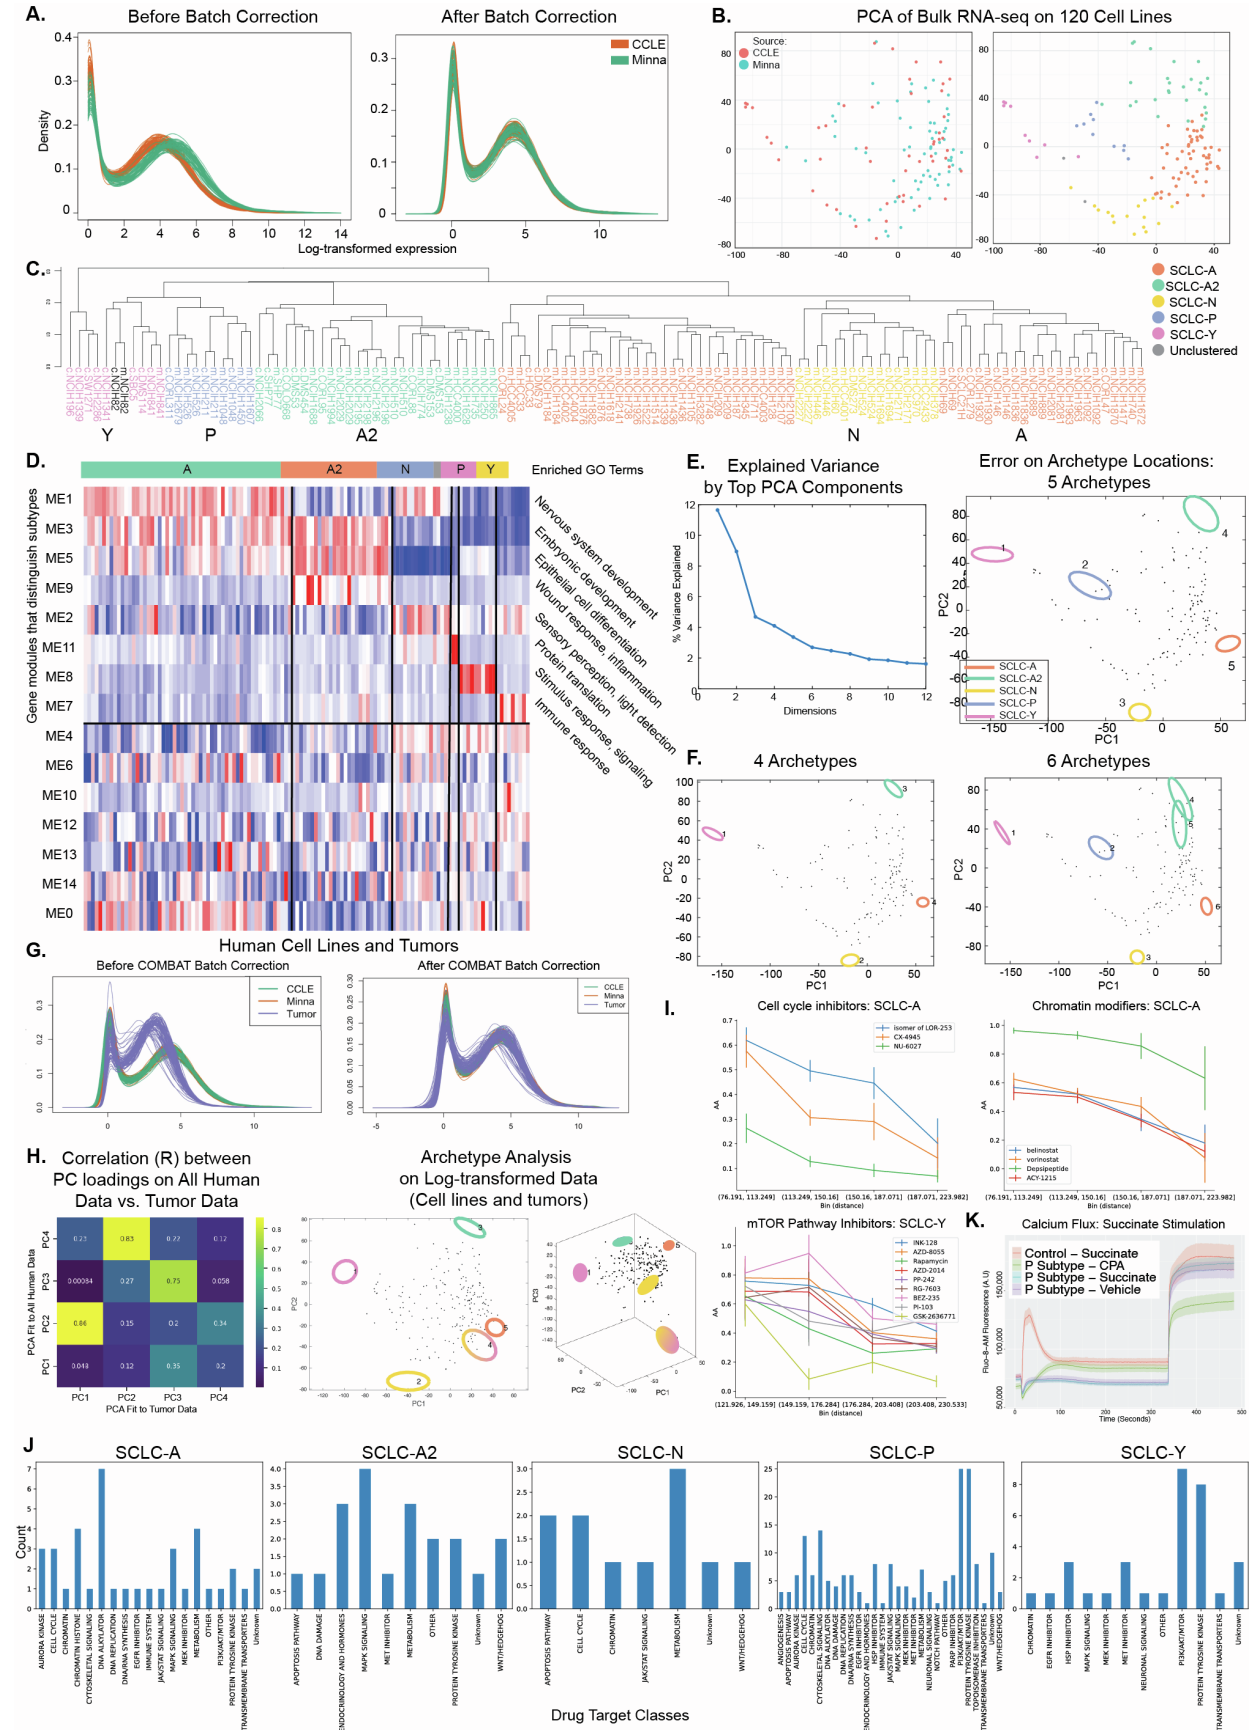

**Supplemental Figure 1: Supplement to bulk RNA-seq preprocessing and PCA on human cell lines, related to Figure 1.** **A.** Gene expression distribution before and after batch correction for CCLE and Minna datasets. **B.** Cell line source in PCA, and clustering shown by color on PCA. **C.** Hierarchical clustering on cell lines as shown in **B** with labels. “C” or “m” designates the source of each cell line. H82 is labeled as unclustered because it is known to express NEUROD1 but is clustered with other SCLC-Y cell lines. **D.** WGCNA on cell lines shows genes can be grouped into 15 coexpressed gene modules. Several of the modules (above black line) distinguish subtype clusters and are labeled with enriched gene ontology terms describing each gene program. **E.** Explained variance in human cell lines by top PCA components. Archetypal analysis on top 12 components gives 5 archetypes with low error upon bootstrapping. **F.** Four or six archetypes correspond to the five archetypes in **E**. **G.** Batch correction of human cell lines and human tumors (81 samples) using COMBAT. Distribution of log-transformed expression is shown before and after correction. **H.** PC loadings on all human data are highly correlated with PC loadings on tumor data only, with PC1 from tumor-data PCA matching PC3 from all-data PCA, PC2 (tumor) matching PC4 (all), and PC3 (tumor) matching (PC3). AA on all human data shows archetypes that match human cell line archetypes. **I-J.** Drug sensitivity to various drug classes. **I** shows select classes for SCLC-A and SCLC-Y, with the cell lines closest to each archetype showing the highest sensitivity (activity area). Response is binned by distance to archetype. **J** shows the significant number of drugs from each class according to an ANOVA (one-vs all) for bin closest to archetype. **K.** H1048 (SCLC-P) cells and a positive control cell line (known to respond to succinate with calcium signaling through SUCNR1) were treated with a concentration response curve of succinate at 10 seconds (maximum treatment, 2.4 mM, shown here) and calcium flux was evaluated. While the control (pink) shows response, the SCLC-P cell line does not show any response to succinate (blue), similar to vehicle (purple). Cyclopiazonic acid (CPA, green) was used to release ER calcium stores to ensure detection of calcium flux was possible. At 340 seconds, ionomycin is added to show maximal calcium signal. Error bars show standard error from 3 replicates for each cell line.

Figure S2: Related to Figure 3

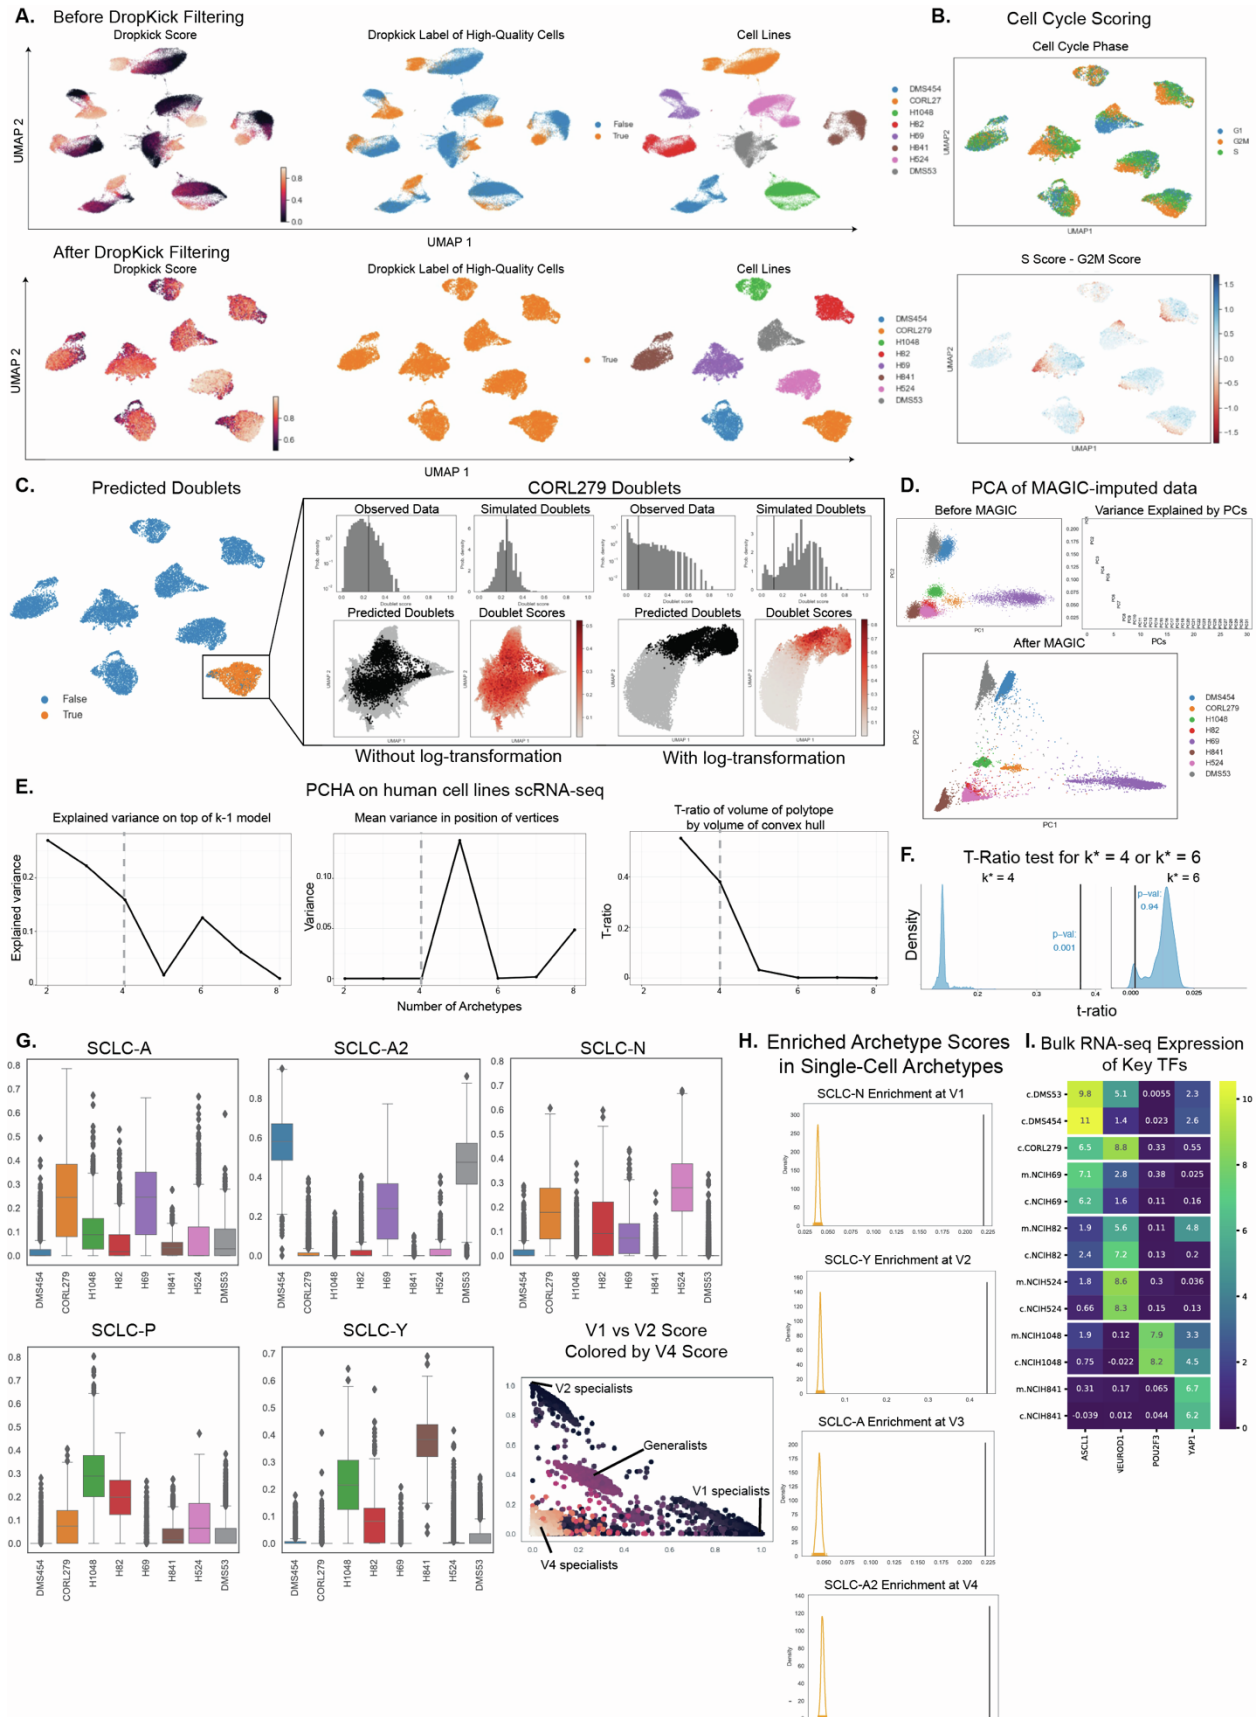

**Supplemental Figure 2: Archetype signature generation and application to scRNA-seq on human cell lines, related to Figure 3.** **A.** Before and after filtering by Dropkick to remove low quality cells. **B.** Cell cycle scoring by Scanpy shows slight dependence of UMAP location on cell cycle. **C.** Predicted doublets using Scrublet. Very few cells are predicted to be doublets except in cell line CORL279. Here, log-transformation shows a distinct region of cells with high likelihood to be doublets, which were removed from future analysis. **D.** PCA of data before and after MAGIC imputation. A high proportion of the variance in the cell lines was explained by the top 10 PCs after MAGIC imputation. **E.** Principal Convex Hull Analysis (PCHA) on single cell data. Explained variance per number of archetypes shows a large dip after 4 archetypes, with an increase for 6 archetypes. Mean variance in position of vertices greatly increases for 5 archetypes, and the T-ratio greatly decreases for 5 archetypes. **F.** T-ratio plots for  $k^* = 4$  or 6. Only  $k^*=4$  gives a significant t-ratio. **G.** Archetype signatures by cell line. Using the signature scoring method (see methods), we see that some cell lines are specialists for a particular archetype (enriched in bulk archetype score). A proportion of the cells across cell lines are generalists, not enriched in any archetype score. **H.** Enrichment of archetype scores at each single-cell vertex by permutation test (see methods).  $P = 0$  for all tests shown, defined as the proportion of the background distribution above the score for archetype specialists at a particular vertex. **I.** Expression of four key SCLC transcription factors in bulk RNA-seq data. Subtype proportions for each cell line are consistent with expression of key TFs at bulk level. For example, H1048 expresses both POU2F3 and YAP1 and is predicted to be a mix of SCLC-P and SCLC-Y specialists and generalists. **e.** Generalist subtype proportions by cell line shown as bar plots.

Figure S3: Related to Figure 4

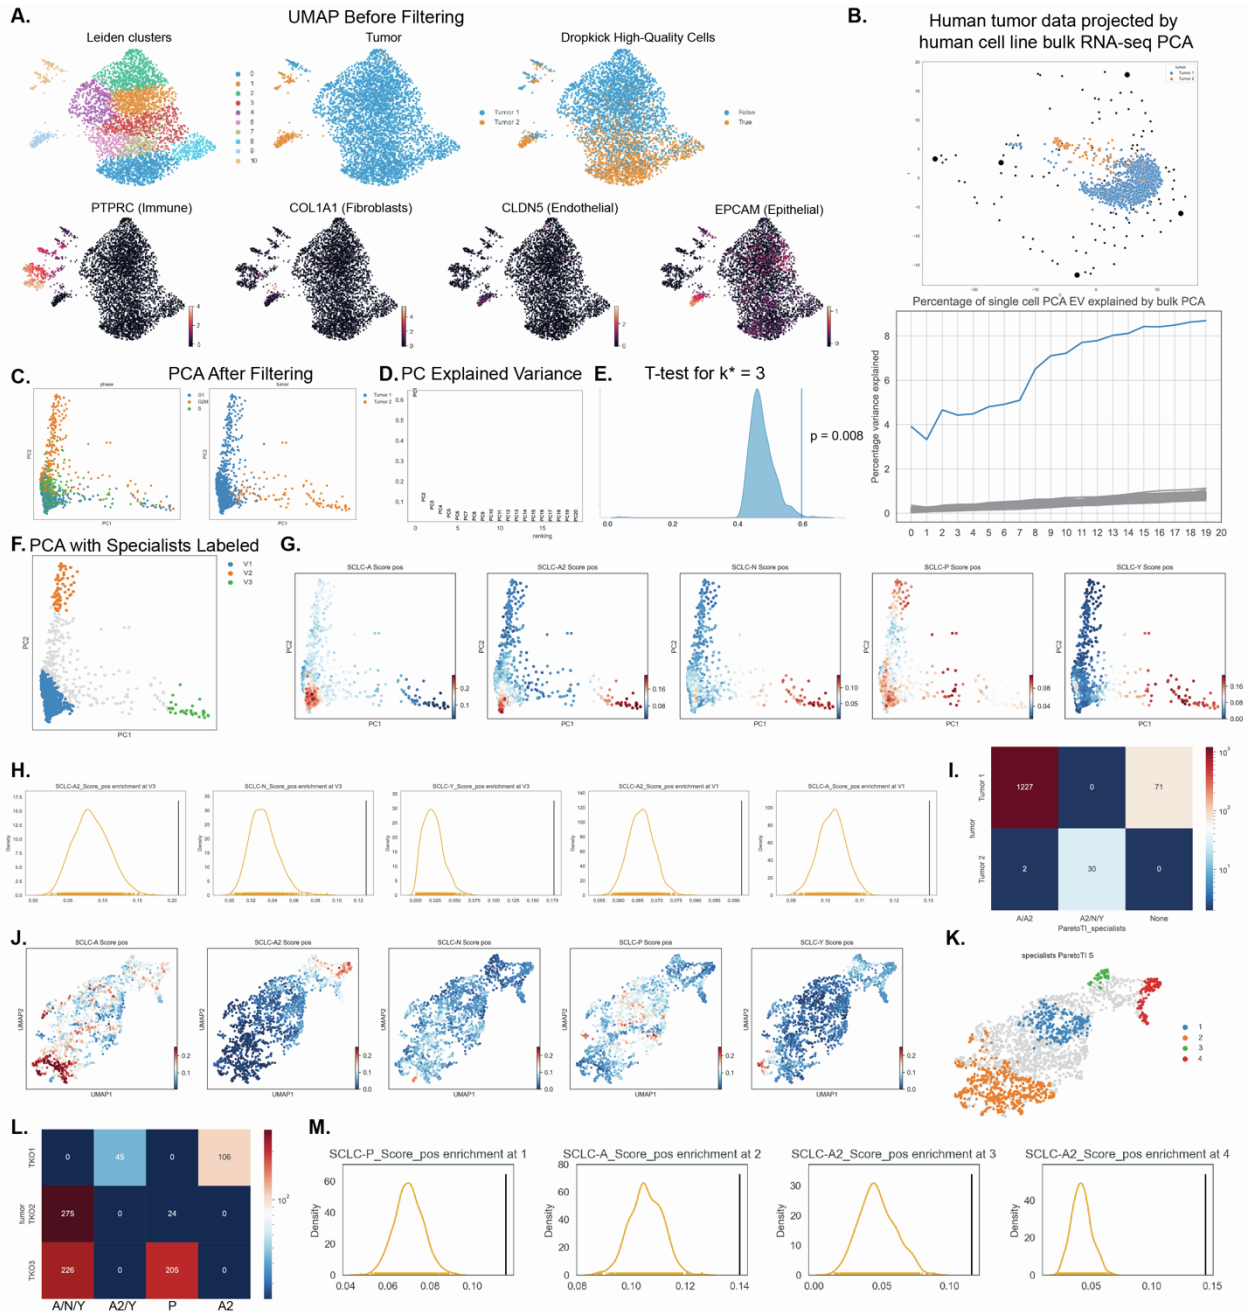

**Supplemental Figure 3: Single cell preprocessing and archetype signature scoring on human and mouse tumors, related to Figure 4.** **A.** UMAP before and after filtering cells. We removed low quality cells as determined by Dropkick. We also removed subpopulations that expressed immune, fibroblast, or endothelial markers. **B.** Human tumor single cell data projected into the bulk archetype space. About 6% of the variance in the single cell tumor data is explained by bulk data on cell lines. **C.** PCA of data after filtering in **A.** and before MAGIC imputation. **D.** Explained variance by top principal components. **E.** T-ratio test for  $k^* = 3$  on human tumor data. **F.** PCA with three archetype specialists labeled before MAGIC imputation. **G.** Scores for bulk archetype signatures on PCA of human tumor data. **H.** Enrichment of archetype signature scores at each single-cell archetype vertex. Only significant enrichments shown. **I.** Number of human tumor cells that are considered specialists for each of the three archetypes. **J.** UMAP of TKO data colored by archetype signature scores. **K.** Four groups of archetype specialists shown on TKO UMAP. **L.** Number of TKO cells from each tumor that are archetype specialists. Archetypes are labeled by all enriched signatures. **M.** Enrichment of archetype signature scores used to label **L.** Only most enriched for each single cell vertex is shown.

Figure S4: Related to Figure 5

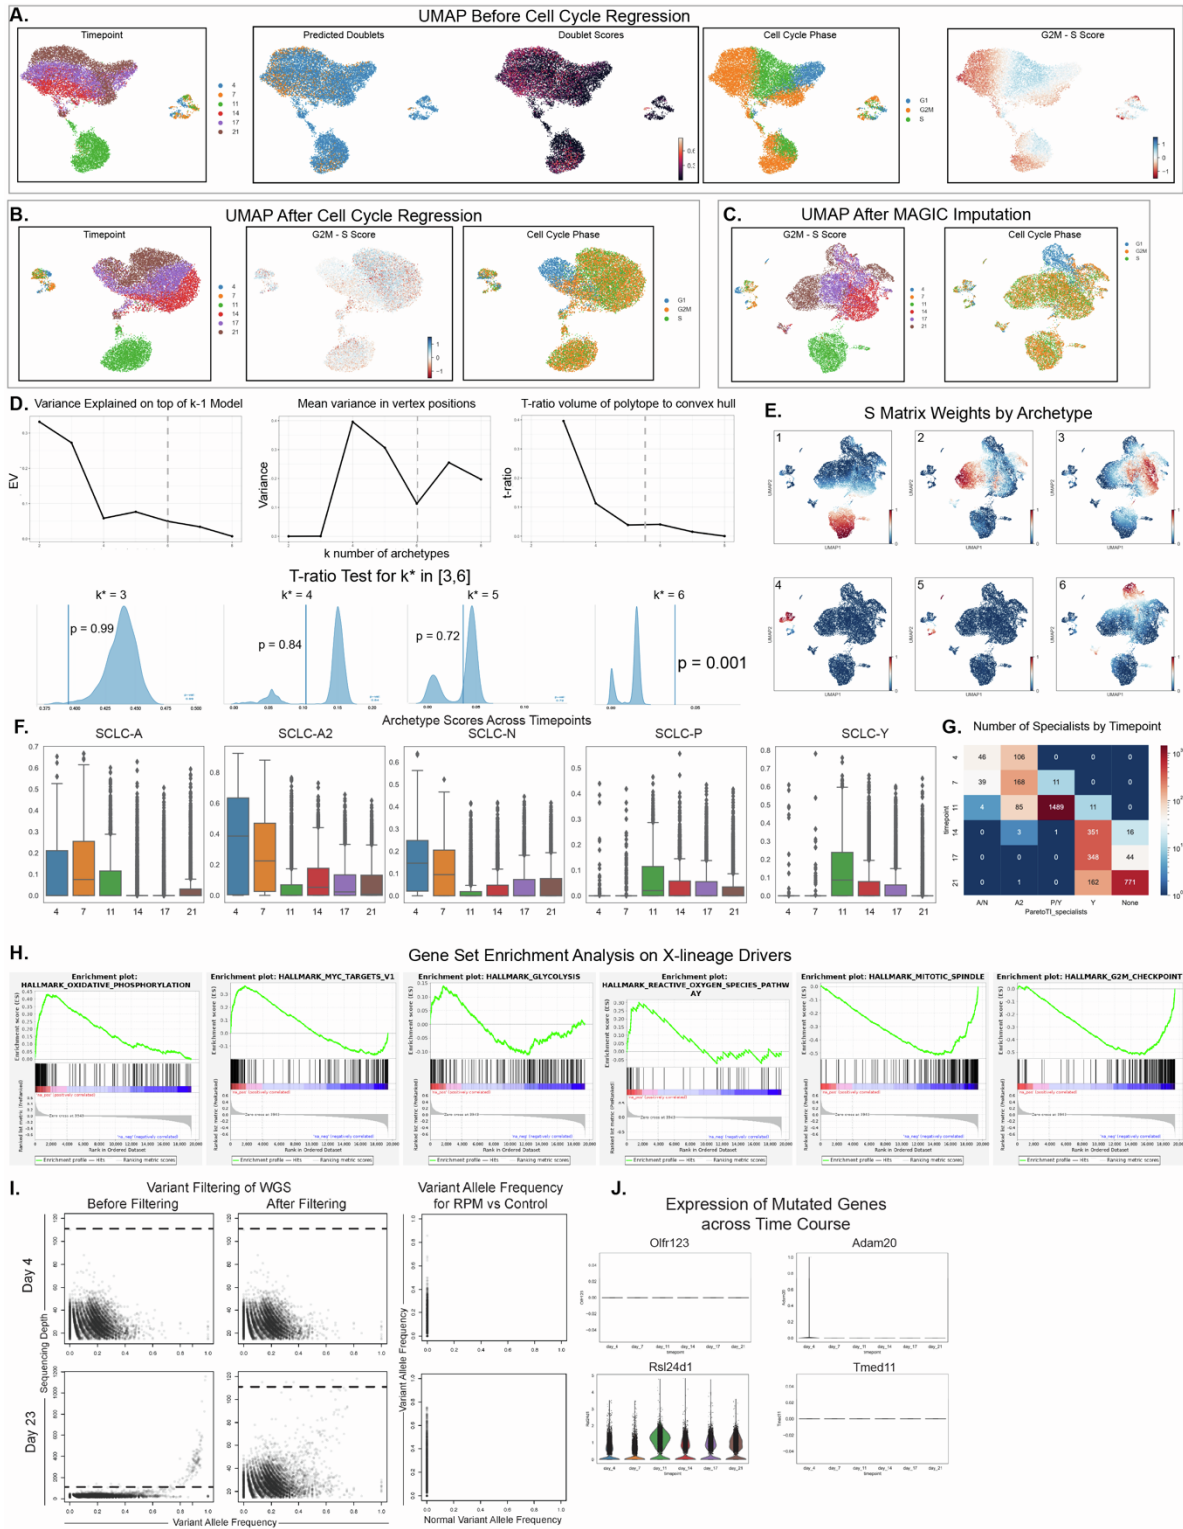



**Supplemental Figure 4: RPM time series scRNA-seq preprocessing and Archetypal Analysis, related to Figure 5.** **A.** UMAP of RPM time series before cell cycle regression, showing timepoints, predicted doublets (removed for downstream analysis), and cell cycle phase and score. **B.** UMAP of data after regressing out cell cycle dependence (G2M-S score). **C.** UMAP after MAGIC imputation. **D.** Variance explained by different numbers of archetypes. Mean variance in vertices shows a decrease for 6 archetypes. T-ratio for different numbers of vertices shows the t-ratio levels off after 5-6 archetypes. Bottom plots show t-ratio tests for 3-6 archetypes. Only  $k^*=6$  is significant. **E.** Archetypal analysis S matrix scores for 6 archetypes. **F.** Bulk archetype signature scores by timepoint. NE (A, A2, and N) scores are higher in earlier timepoints. **G.** Number of archetype specialists across timepoints. **H.** Gene set enrichment analysis shows X specialists are enriched in oxidative phosphorylation, MYC targets, glycolysis, and ROS pathway, and depleted in mitotic spindle and G2M checkpoint gene sets **I. (Left)** Variant allele frequency (VAF) before and after filtering for two timepoints of independent RPM time series. We only consider the variants that have more than 15 reads and less than 110 reads coverage (depth, DP). **(Right)** VAF in normal control sample versus RPM timepoints. Somatic variants in RPM samples have no alternative alleles in the normal sample. **J.** Expression of four genes coded by genomic regions with somatic mutations. Three of the four genes have low to no expression across the time course.

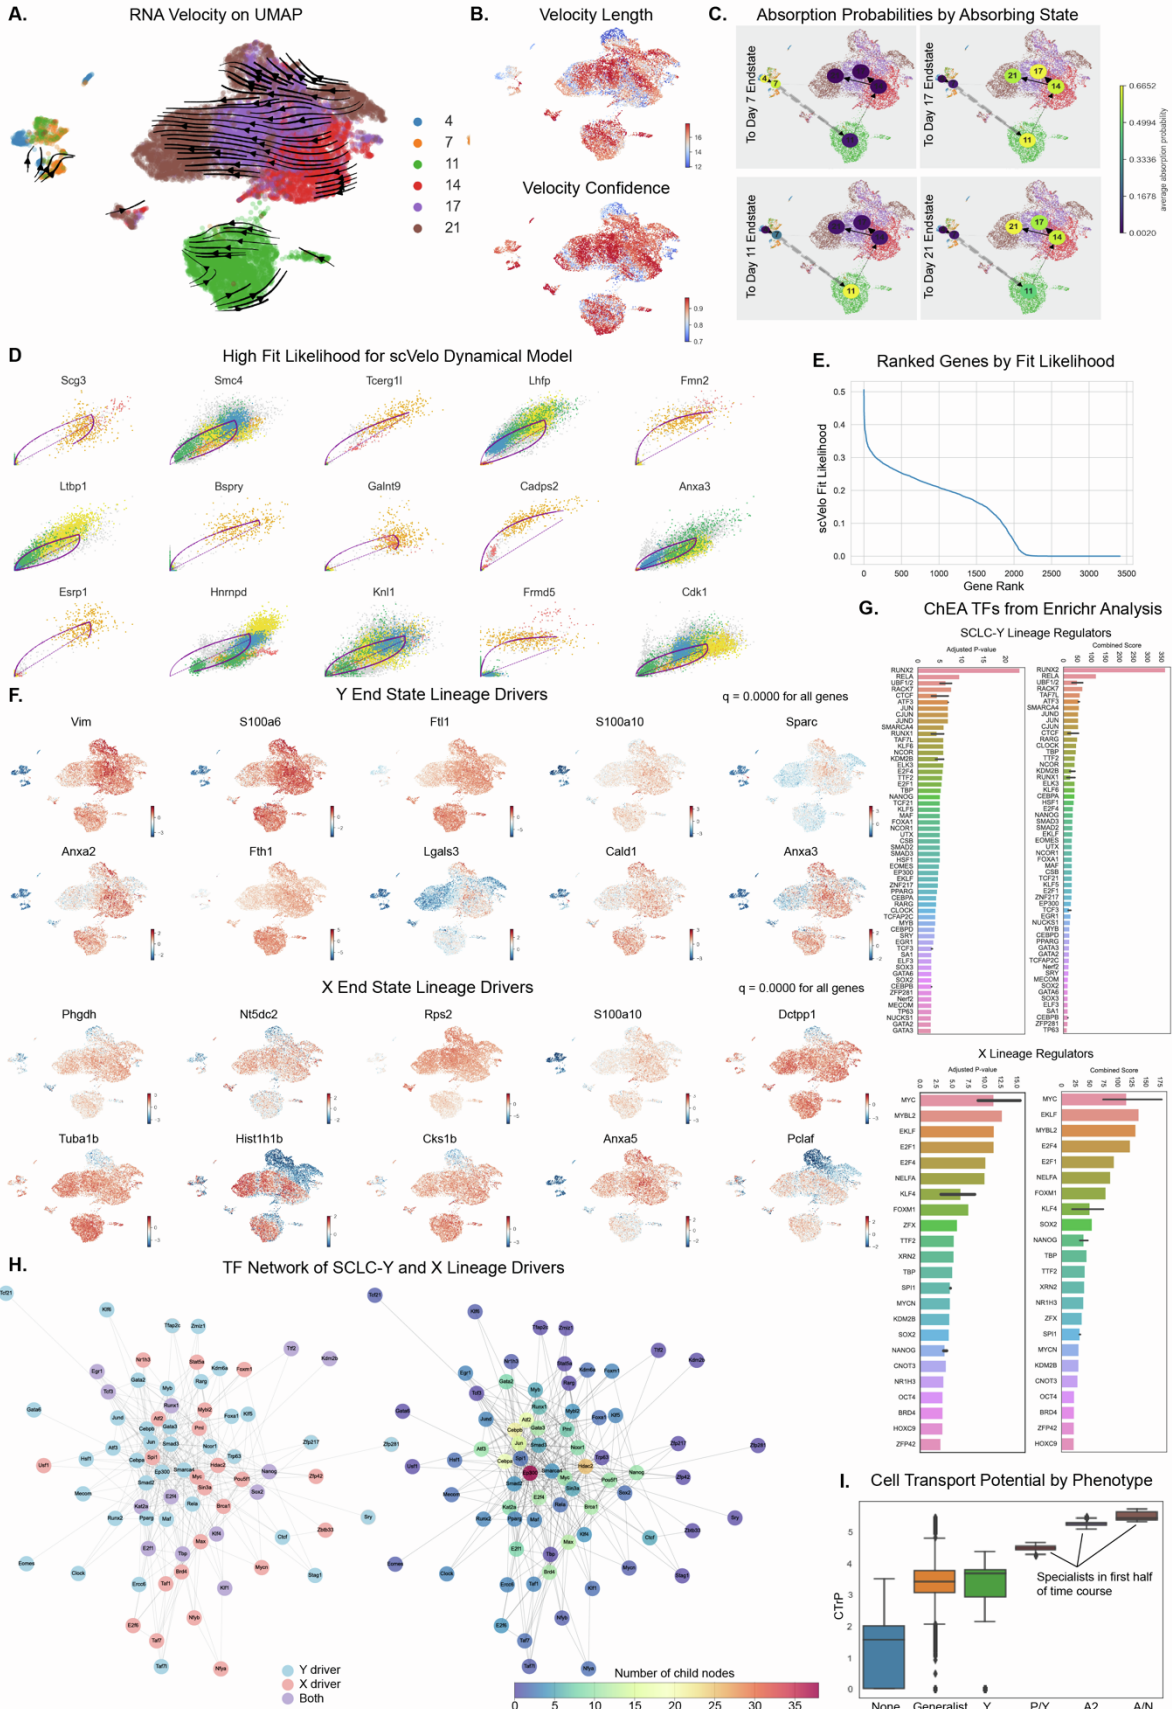

**Supplemental Figure 5: Single cell velocity and plasticity for RPM time series, related to Figure 5.** **A.** RNA velocity streams shown on UMAP across timepoints. **B.** Velocity length and confidence shows most cells have significant velocity vectors. **C.** Absorption probabilities by absorbing state. Each circle represents a timepoint, colored by probability of absorption at that end state. **D.** Top fit likelihood genes from scVelo dynamical model are shown as unspliced vs spliced RNA phase plots. Fit from scVelo model is overlaid. **E.** Plot of scVelo velocity genes show the distribution of model fit likelihoods. **F.** Lineage drivers for Y and X end states shown on UMAP. Q-value from CellRank analysis was 0 for all genes shown. **G.** TFs that are significant regulators of SCLC-Y and X lineages. Shown are TFs from ChEA only. **H.** TF network of lineage drivers. Left: TFs are colored by lineage; some TFs are shared between lineages and shown in purple. Only TFs that connect to this single main network are shown. Right: TFs are colored by number of child nodes they regulate in the network. P300 regulates the most child nodes at 38, making it the most central node to the lineage drivers in this time course. Other central TFs include MYC, CEBP family genes, JUN, and RUNX1/2. **I.** CTrP decreases from early-timepoint archetypes, including A/N, A2, and P/Y to the X archetype. While SCLC-Y is an absorbing state in the system, many of the Y specialists still have high plasticity.

**TABLE S1:** Enriched gene ontology sets for WGCNA gene modules, related to Figure 1 and Supplemental Figure 1.

|            | module      | rank | BonferoniP           | termName                                                            |
|------------|-------------|------|----------------------|---------------------------------------------------------------------|
| GO:0010469 | black       | 1    | 5.41916084864334E-11 | regulation of signaling receptor activity                           |
| GO:0002376 | black       | 2    | 1.36044649385637E-10 | immune system process                                               |
| GO:0019221 | black       | 3    | 4.78960054486425E-09 | cytokine-mediated signaling pathway                                 |
| GO:0006952 | black       | 4    | 2.42469343558444E-08 | defense response                                                    |
| GO:0006955 | black       | 5    | 4.69316153816772E-08 | immune response                                                     |
| GO:0050896 | black       | 6    | 8.49931302506631E-08 | response to stimulus                                                |
| GO:0071345 | black       | 7    | 1.23794999100474E-07 | cellular response to cytokine stimulus                              |
| GO:0010033 | black       | 8    | 1.26245570838546E-07 | response to organic substance                                       |
| GO:0034097 | black       | 9    | 2.01692523059288E-07 | response to cytokine                                                |
| GO:0071310 | black       | 10   | 2.10423276086616E-07 | cellular response to organic substance                              |
| GO:0006614 | blue        | 1    | 1.83217154002747E-70 | SRP-dependent cotranslational protein targeting to membrane         |
| GO:0045047 | blue        | 2    | 2.74659123121613E-70 | protein targeting to ER                                             |
| GO:0006613 | blue        | 3    | 5.67127573760014E-70 | cotranslational protein targeting to membrane                       |
| GO:0072599 | blue        | 4    | 1.71906737898291E-67 | establishment of protein localization to endoplasmic reticulum      |
| GO:0006413 | blue        | 5    | 6.60288167437702E-67 | translational initiation                                            |
| GO:0070972 | blue        | 6    | 4.77255979775339E-59 | protein localization to endoplasmic reticulum                       |
| GO:0000184 | blue        | 7    | 1.43980928636161E-58 | nuclear-transcribed mRNA catabolic process, nonsense-mediated decay |
| GO:0006412 | blue        | 8    | 7.45975686394416E-51 | translation                                                         |
| GO:0043043 | blue        | 9    | 2.61702997425545E-49 | peptide biosynthetic process                                        |
| GO:0006612 | blue        | 10   | 1.3760947336365E-48  | protein targeting to membrane                                       |
| GO:0007389 | brown       | 1    | 9.00072374428462E-06 | pattern specification process                                       |
| GO:0009952 | brown       | 2    | 1.40907099080107E-05 | anterior/posterior pattern specification                            |
| GO:0009653 | brown       | 3    | 1.97133081485968E-05 | anatomical structure morphogenesis                                  |
| GO:0048562 | brown       | 4    | 0.000135596798135959 | embryonic organ morphogenesis                                       |
| GO:0009887 | brown       | 5    | 0.00025335099713845  | animal organ morphogenesis                                          |
| GO:0035295 | brown       | 6    | 0.000445762256451326 | tube development                                                    |
| GO:0061448 | brown       | 7    | 0.00104695406930455  | connective tissue development                                       |
| GO:0001501 | brown       | 8    | 0.00149131167061171  | skeletal system development                                         |
| GO:0001503 | brown       | 9    | 0.00189339053997136  | ossification                                                        |
| GO:0048598 | brown       | 10   | 0.00272237625947707  | embryonic morphogenesis                                             |
| GO:0030855 | green       | 1    | 0.00524960878716573  | epithelial cell differentiation                                     |
| GO:0009913 | green       | 2    | 0.00585302188687668  | epidermal cell differentiation                                      |
| GO:0007601 | greenyellow | 1    | 1.02307056861811E-23 | visual perception                                                   |
| GO:0050953 | greenyellow | 2    | 1.58203099926516E-23 | sensory perception of light stimulus                                |
| GO:0009583 | greenyellow | 3    | 4.20691807112603E-21 | detection of light stimulus                                         |
| GO:0009584 | greenyellow | 4    | 3.49056349597458E-18 | detection of visible light                                          |
| GO:0007600 | greenyellow | 5    | 5.78682847909344E-18 | sensory perception                                                  |
| GO:0007602 | greenyellow | 6    | 1.92104592826975E-15 | phototransduction                                                   |
| GO:0009582 | greenyellow | 7    | 2.9128012763726E-15  | detection of abiotic stimulus                                       |
| GO:0050877 | greenyellow | 8    | 7.5166345639531E-15  | nervous system process                                              |
| GO:0007603 | greenyellow | 9    | 2.68990946205477E-11 | phototransduction, visible light                                    |
| GO:0051606 | greenyellow | 10   | 4.76588097439568E-10 | detection of stimulus                                               |
| GO:0043062 | magenta     | 1    | 7.7980511165155E-06  | extracellular structure organization                                |
| GO:0016485 | magenta     | 2    | 3.28489617884439E-05 | protein processing                                                  |
| GO:0072378 | magenta     | 3    | 0.00012511754875909  | blood coagulation, fibrin clot formation                            |

|             |           |    |                      |                                                                        |
|-------------|-----------|----|----------------------|------------------------------------------------------------------------|
| GO:0002526  | magenta   | 4  | 0.000181335852420731 | acute inflammatory response                                            |
| GO:0007596  | magenta   | 5  | 0.000399405014868462 | blood coagulation                                                      |
| GO:0050817  | magenta   | 6  | 0.000456295966454984 | coagulation                                                            |
| GO:0042730  | magenta   | 7  | 0.000475843568240935 | fibrinolysis                                                           |
| GO:0007599  | magenta   | 8  | 0.000520580010033955 | hemostasis                                                             |
| GO:0009611  | magenta   | 9  | 0.000616280707557106 | response to wounding                                                   |
| GO:0030195  | magenta   | 10 | 0.000623918863711097 | negative regulation of blood coagulation                               |
| GO:0050909  | pink      | 1  | 9.67488443467652E-06 | sensory perception of taste                                            |
| GO:0007606  | pink      | 2  | 0.000449182758350224 | sensory perception of chemical stimulus                                |
| GO:0050913  | pink      | 3  | 0.00327207494497955  | sensory perception of bitter taste                                     |
| GO:00076001 | pink      | 4  | 0.0231935191361072   | sensory perception                                                     |
| GO:0007154  | pink      | 5  | 0.0246589427099578   | cell communication                                                     |
| GO:0023052  | pink      | 6  | 0.0335258047170497   | signaling                                                              |
| GO:0050907  | pink      | 7  | 0.0433065934040735   | detection of chemical stimulus involved in sensory perception          |
| GO:0050912  | pink      | 8  | 0.0433541770333006   | detection of chemical stimulus involved in sensory perception of taste |
| GO:0030198  | purple    | 1  | 5.42382880572989E-13 | extracellular matrix organization                                      |
| GO:00430621 | purple    | 2  | 3.51409407746252E-12 | extracellular structure organization                                   |
| GO:00071551 | purple    | 3  | 1.12511761810867E-10 | cell adhesion                                                          |
| GO:0031589  | purple    | 4  | 3.2945295161713E-06  | cell-substrate adhesion                                                |
| GO:0030199  | purple    | 5  | 4.78999654317724E-06 | collagen fibril organization                                           |
| GO:0016477  | purple    | 6  | 0.000343378507309123 | cell migration                                                         |
| GO:0001568  | purple    | 7  | 0.000683194027183539 | blood vessel development                                               |
| GO:0030334  | purple    | 8  | 0.000890213885065437 | regulation of cell migration                                           |
| GO:0097435  | purple    | 9  | 0.0011886153475409   | supramolecular fiber organization                                      |
| GO:0007275  | purple    | 10 | 0.00160315082440526  | multicellular organism development                                     |
| GO:0000398  | red       | 1  | 2.57738792798907E-06 | mRNA splicing, via spliceosome                                         |
| GO:0000375  | red       | 2  | 3.5919199343137E-06  | RNA splicing, via transesterification reactions                        |
| GO:0006396  | red       | 3  | 9.12811484429963E-06 | RNA processing                                                         |
| GO:0006397  | red       | 4  | 1.10532705953669E-05 | mRNA processing                                                        |
| GO:00512761 | red       | 5  | 2.41219214764632E-05 | chromosome organization                                                |
| GO:0008380  | red       | 6  | 2.62805829781647E-05 | RNA splicing                                                           |
| GO:0016071  | red       | 7  | 0.000934567581633522 | mRNA metabolic process                                                 |
| GO:0006139  | red       | 8  | 0.0013655298649833   | nucleobase-containing compound metabolic process                       |
| GO:0010467  | red       | 9  | 0.00432486805379817  | gene expression                                                        |
| GO:0006725  | red       | 10 | 0.00443057133065571  | cellular aromatic compound metabolic process                           |
| GO:0007399  | turquoise | 1  | 3.9114341467648E-05  | nervous system development                                             |
| GO:0000902  | turquoise | 2  | 0.00402353158660299  | cell morphogenesis                                                     |
| GO:0016192  | turquoise | 3  | 0.00604961042869958  | vesicle-mediated transport                                             |
| GO:0034341  | turquoise | 4  | 0.00859028231135073  | response to interferon-gamma                                           |
| GO:00023761 | turquoise | 5  | 0.00883676212382238  | immune system process                                                  |
| GO:0017156  | turquoise | 6  | 0.0240986850760173   | calcium ion regulated exocytosis                                       |
| GO:00069551 | turquoise | 7  | 0.0302567580390949   | immune response                                                        |
| GO:0031175  | turquoise | 8  | 0.0303206741552842   | neuron projection development                                          |
| GO:0007269  | turquoise | 9  | 0.0335084605142006   | neurotransmitter secretion                                             |
| GO:0051648  | turquoise | 10 | 0.0361443406404716   | vesicle localization                                                   |
| GO:0022613  | yellow    | 1  | 5.87050662329621E-31 | ribonucleoprotein complex biogenesis                                   |
| GO:0042254  | yellow    | 2  | 2.23255954053755E-30 | ribosome biogenesis                                                    |
| GO:00325431 | yellow    | 3  | 6.63574196367001E-26 | mitochondrial translation                                              |
| GO:0016072  | yellow    | 4  | 6.30220844813267E-25 | rRNA metabolic process                                                 |

|             |        |    |                      |                                              |
|-------------|--------|----|----------------------|----------------------------------------------|
| GO:00063961 | yellow | 5  | 2.47108038978792E-23 | RNA processing                               |
| GO:0006364  | yellow | 6  | 5.07588017100682E-23 | rRNA processing                              |
| GO:00346411 | yellow | 7  | 8.32096755475593E-23 | cellular nitrogen compound metabolic process |
| GO:00064151 | yellow | 8  | 4.06699051891866E-20 | translational termination                    |
| GO:00701251 | yellow | 9  | 9.04338768501359E-20 | mitochondrial translational elongation       |
| GO:00701261 | yellow | 10 | 2.77432045935756E-19 | mitochondrial translational termination      |

**Table S2:** T-ratios for Polytopes fit to Human Cell Lines, related to Figure 1

| # of vertices | P-value | T-ratio |
|---------------|---------|---------|
| 3             | 0.508   | 0.520   |
| 4             | 0.059   | 0.247   |
| 5             | 0.034   | 0.107   |
| 6             | 0.016   | 0.042   |
| 7             | 0.001   | 0.020   |

**Table S3:** Hypergeometric test for archetype enrichments from polytopes fit to human cell lines with different numbers of vertices, related to Figure 1

| Original archetype (cell lines only)<br>$k^* = 5$ | Matching archetypes from cell lines<br>$k^* = 4$ | p-value of Hypergeometric test on enrichments | Matching archetypes from cell lines<br>$k^* = 6$ | p-value of Hypergeometric test on enrichments |
|---------------------------------------------------|--------------------------------------------------|-----------------------------------------------|--------------------------------------------------|-----------------------------------------------|
| 1 (Y)                                             | 1                                                | $P_1 = 0$                                     | 1 & 2                                            | $P_1 = 0,$<br>$P_2 = 1.94 \times 10^{-27}$    |
| 2 (P)                                             | 1                                                | $P_1 = 3.73 \times 10^{-15}$                  | 1 & 2                                            | $P_1 = 2.14 \times 10^{-19},$<br>$P_2 = 0$    |
| 3 (N)                                             | 2                                                | $P_2 = 0$                                     | 3                                                | $P_3 = 0$                                     |
| 4 (A2)                                            | 3                                                | $P_3 = 0$                                     | 4 & 5                                            | $P_4 = 0,$<br>$P_5 = 5.21 \times 10^{-131}$   |
| 5 (A)                                             | 4                                                | $P_4 = 4.38 \times 10^{-90}$                  | 6                                                | $P_6 = 2.52 \times 10^{-85}$                  |

**Table S4:** Cell line archetypes compared to tumor + cell line archetypes, related to Figure 1

| Original (cell lines only) archetype [ $k^* = 5$ ] | Matching archetypes from combined dataset [ $k^* = 5$ ] | p-value of Hypergeometric test on enrichments |
|----------------------------------------------------|---------------------------------------------------------|-----------------------------------------------|
| 1 (Y)                                              | 1 & 4                                                   | $P_1 = 0, P_4 = 0$                            |
| 2 (P)                                              | 1                                                       | $P_1 = 2.5 \times 10^{-96}$                   |
| 3 (N)                                              | 2 & 4                                                   | $P_2 = 1.6 \times 10^{-221}, P_4 = 0$         |
| 4 (A2)                                             | 3                                                       | $P_3 = 0$                                     |
| 5 (A)                                              | 5                                                       | $P_5 = 1.39 \times 10^{-17}$                  |

**Table S5:** Table of q values for gene enrichment at archetypes for bulk RNA-seq data.  $Q < .1$  is considered significant; Mann-Whitney test. Related to Figure 2.

**Table S6:** Table of q values for gene set/task enrichment at archetypes for bulk RNA-seq data using ConsensusPathDB. Related to Figure 1.

**Table S7:** Table of q values for Cancer Hallmark Gene Set enrichment at archetypes for bulk RNA-seq data.  $Q < .1$  is considered significant; Mann-Whitney test. Related to Table 1.

| archetype # | Feature Name                       | P value (Mann-Whitney) | Median Difference | Mean Difference | Significant after Benjamini-Hochberg correction? | Is first bin maximal? |
|-------------|------------------------------------|------------------------|-------------------|-----------------|--------------------------------------------------|-----------------------|
| SCLC-A2     | Evading Immune Destruction         | 0.00067758             | 0.21293           | 0.17362         | 1                                                | 1                     |
| SCLC-A2     | Tumor-Promoting Inflammation       | 0.0039469              | 0.18223           | 0.13398         | 1                                                | 1                     |
| SCLC-A2     | Inducing Angiogenesis              | 0.015203               | 0.16121           | 0.09591         | 1                                                | 1                     |
| SCLC-P      | Genome Instability and Mutation    | 0.00054072             | 0.19115           | 0.17446         | 1                                                | 1                     |
| SCLC-P      | Reprogramming Energy Metabolism    | 0.0029794              | 0.10543           | 0.11382         | 1                                                | 1                     |
| SCLC-Y      | Inducing Angiogenesis              | 2.93E-06               | 0.35277           | 0.35909         | 1                                                | 1                     |
| SCLC-Y      | Resisting Cell Death               | 2.08E-06               | 0.28998           | 0.26927         | 1                                                | 1                     |
| SCLC-Y      | Evading Immune Destruction         | 0.00042998             | 0.21291           | 0.20354         | 1                                                | 1                     |
| SCLC-Y      | Genome Instability and Mutation    | 5.21E-05               | 0.20138           | 0.20953         | 1                                                | 1                     |
| SCLC-Y      | Sustaining Proliferative Signaling | 4.84E-05               | 0.20129           | 0.17892         | 1                                                | 1                     |
| SCLC-Y      | Evading Growth Suppressors         | 6.05E-05               | 0.19485           | 0.18497         | 1                                                | 1                     |
| SCLC-Y      | Tumor-Promoting Inflammation       | 0.00020448             | 0.18833           | 0.1922          | 1                                                | 1                     |
| SCLC-Y      | Enabling Replicative Immortality   | 6.51E-05               | 0.18322           | 0.15924         | 1                                                | 1                     |
| SCLC-Y      | Activating Invasion and Metastasis | 0.00065623             | 0.16008           | 0.14933         | 1                                                | 1                     |
| SCLC-Y      | Reprogramming Energy Metabolism    | 0.00037661             | 0.14285           | 0.14035         | 1                                                | 1                     |

**Table S8:** NE stem cell and transit-amplifying genes, related to Figure 2.

|        | NEstem | TA | NE |
|--------|--------|----|----|
| Notch2 | 1      | 1  | 0  |
| Hes1   | 1      | 1  | 0  |
| Nrarp  | 1      | 0  | 0  |
| p53    | 0      | 0  | 0  |
| Rb     | 0      | 0  | 0  |
| Hes6   | 1      | 0  | 0  |
| Jag1   | 1      | 0  | 0  |
| Piezo2 | 1      | 0  | 1  |
| Ret    | 1      | 0  | 1  |
| Ptprz1 | 1      | 0  | 1  |
| Scnn1a | 1      | 0  | 1  |
| Trpm7  | 1      | 0  | 1  |
| Chga   | 1      | 0  | 1  |

|          |   |   |   |
|----------|---|---|---|
| Ddc      | 1 | 0 | 1 |
| Gad1     | 1 | 0 | 1 |
| Pcsk1    | 1 | 0 | 1 |
| Ptpn     | 1 | 0 | 1 |
| Scg2     | 1 | 0 | 1 |
| Snap25   | 1 | 0 | 1 |
| Syt7     | 1 | 0 | 1 |
| Casr     | 1 | 0 | 1 |
| Kenk2    | 1 | 0 | 1 |
| Slit     | 0 | 0 | 1 |
| Resp18   | 0 | 0 | 1 |
| Rapgef4  | 0 | 0 | 1 |
| Slitrk2  | 0 | 0 | 1 |
| Fn13     | 0 | 0 | 1 |
| Rn18s    | 0 | 0 | 1 |
| Gm6548   | 0 | 0 | 1 |
| Zrsr1    | 0 | 0 | 1 |
| Ascl1    | 1 | 0 | 1 |
| Calca    | 0 | 0 | 1 |
| Scgb3a2  | 0 | 1 | 0 |
| Cbr2     | 0 | 1 | 0 |
| Lyz2     | 0 | 1 | 0 |
| Foxj1    | 0 | 1 | 0 |
| Myb      | 0 | 1 | 0 |
| Sftpc    | 0 | 1 | 0 |
| Fmo2     | 0 | 1 | 0 |
| Cyp2f2   | 0 | 1 | 0 |
| Sftpa1   | 0 | 1 | 0 |
| Sparc    | 0 | 1 | 0 |
| Serping1 | 0 | 1 | 0 |
| Lyz1     | 0 | 1 | 0 |
| Ppic     | 0 | 1 | 0 |
| Fstl1    | 0 | 1 | 0 |
| Anxa3    | 0 | 1 | 0 |
| Foxq`    | 0 | 1 | 0 |
| Cd74     | 0 | 1 | 0 |
| Ctsh     | 0 | 1 | 0 |
| Ldhb     | 0 | 1 | 0 |
| Ptgr1    | 0 | 1 | 0 |
| Slcbal4  | 0 | 1 | 0 |
| Sftpd    | 0 | 1 | 0 |

**Table S9:** Archetype gene signature expression data, related to Figure 3.

| Gene   | SCLC-A | SCLC-A2 | SCLC-N | SCLC-P | SCLC-Y |
|--------|--------|---------|--------|--------|--------|
| TAGLN3 | 8.85   | 6.10    | 5.62   | 1.55   | -0.70  |
| RBP1   | 8.16   | 5.32    | 5.73   | 2.88   | 2.54   |
| ISL1   | 7.48   | 3.40    | 2.62   | 1.36   | 0.07   |
| ELAVL3 | 7.35   | 4.22    | 5.78   | 0.18   | 0.50   |
| PCP4   | 7.29   | 5.64    | 3.03   | 1.91   | 0.75   |
| TCEAL2 | 6.82   | 2.07    | 4.43   | -0.50  | 1.10   |
| SOX1   | 6.44   | 3.00    | 1.18   | 1.19   | -0.50  |
| GHRH   | 6.01   | 1.57    | 0.35   | 1.89   | 0.23   |



|           |      |       |       |       |       |
|-----------|------|-------|-------|-------|-------|
| NSG1      | 5.97 | 1.82  | 4.31  | 3.31  | 0.98  |
| CD200     | 5.86 | 2.12  | 3.62  | 1.11  | -0.80 |
| MBNL3     | 5.57 | 3.53  | 2.06  | 3.10  | 0.51  |
| PTN       | 5.43 | 2.52  | 2.25  | -0.85 | 3.07  |
| DCX       | 5.02 | 1.08  | 4.86  | -0.83 | -0.63 |
| SHD       | 4.86 | 0.64  | 4.18  | -1.04 | 0.43  |
| GAD2      | 4.31 | 2.94  | 1.24  | -0.33 | -0.01 |
| FGD3      | 4.30 | 2.77  | 0.85  | 1.67  | -0.04 |
| ILDR2     | 4.15 | 2.50  | 1.33  | 0.68  | -0.02 |
| NNAT      | 3.81 | 1.52  | 2.27  | 1.57  | 1.05  |
| FLII      | 3.08 | 2.86  | 0.28  | 1.61  | -0.32 |
| AVP       | 1.21 | 0.20  | 0.23  | -0.22 | -0.24 |
| ASCL1     | 8.02 | 10.81 | 1.73  | 1.05  | 0.88  |
| GRP       | 4.85 | 9.72  | 0.85  | -1.38 | 0.90  |
| ELF3      | 3.93 | 8.77  | -0.12 | 4.77  | 1.63  |
| SCNN1A    | 6.18 | 8.37  | 0.43  | 4.49  | -0.31 |
| CEACAM5   | 2.21 | 8.25  | -0.38 | 0.71  | 0.27  |
| WFDC2     | 6.20 | 7.63  | 1.45  | 3.38  | 2.61  |
| MS4A8     | 3.76 | 7.26  | 0.31  | 0.06  | -1.11 |
| TMEM176A  | 3.18 | 7.23  | 0.98  | 0.83  | 0.22  |
| FAM3B     | 2.66 | 7.17  | -0.47 | 2.27  | 0.16  |
| TMEM176B  | 2.84 | 6.91  | 0.98  | 0.27  | 0.74  |
| CALCA     | 0.28 | 6.91  | -0.57 | 1.83  | 1.56  |
| TSPAN1    | 1.80 | 6.18  | 0.69  | 0.03  | 2.33  |
| TSPAN8    | 1.17 | 5.95  | -0.24 | 1.06  | 1.65  |
| NPTX1     | 2.59 | 5.93  | 4.09  | 0.87  | 2.50  |
| SCIN      | 1.53 | 5.89  | 0.51  | 2.84  | 0.00  |
| RASSF6    | 5.10 | 5.77  | 0.31  | 4.39  | -0.21 |
| KLK11     | 2.41 | 5.39  | -1.02 | 2.29  | 0.94  |
| SKAP1     | 0.61 | 5.11  | 0.32  | 0.62  | 0.96  |
| KLK12     | 1.39 | 5.06  | -1.06 | 2.26  | 0.34  |
| GJB1      | 0.83 | 4.81  | -0.38 | 0.53  | -0.64 |
| AOC1      | 0.16 | 3.19  | -0.52 | 0.59  | 0.18  |
| NEUROD1   | 1.81 | 0.68  | 7.19  | 0.29  | 0.33  |
| KCNQ2     | 3.58 | 0.15  | 6.83  | 0.02  | 2.16  |
| OLFM1     | 3.78 | 0.93  | 6.66  | -0.77 | 4.40  |
| CAMKV     | 2.43 | 1.15  | 6.11  | 1.74  | 0.26  |
| MFAP4     | 2.68 | -0.03 | 5.81  | 0.26  | 1.40  |
| PPP1R17   | 1.76 | -0.13 | 5.57  | -0.38 | -0.46 |
| CNTN1     | 2.06 | 2.49  | 5.30  | 2.68  | 0.98  |
| CERKL     | 2.06 | 0.22  | 5.16  | 0.19  | 0.99  |
| ADCYAP1R1 | 0.96 | -0.57 | 4.64  | 0.73  | 0.17  |
| SSTR2     | 1.93 | 0.06  | 4.61  | -0.04 | 0.14  |
| RBFOX3    | 1.81 | -0.55 | 4.58  | -0.73 | 1.88  |
| SLC38A5   | 0.24 | 0.26  | 4.50  | 1.36  | 0.56  |
| CTNND2    | 2.16 | 0.25  | 4.32  | 2.58  | 0.28  |
| TSPAN18   | 0.86 | 0.47  | 4.22  | 0.36  | 1.83  |
| ANGPTL2   | 0.84 | 0.25  | 4.07  | 0.22  | 0.75  |
| KCNJ3     | 0.60 | 0.88  | 4.03  | 0.96  | 0.19  |
| NHLH2     | 1.50 | -0.16 | 3.85  | -0.27 | -0.14 |
| NEUROD2   | 0.77 | -0.33 | 3.77  | 0.07  | -0.29 |
| PLCH2     | 0.56 | 0.17  | 3.70  | 0.06  | 0.02  |

|           |       |       |       |       |       |
|-----------|-------|-------|-------|-------|-------|
| ZFPM2     | 0.28  | -0.21 | 3.11  | 0.48  | 1.21  |
| NEUROD6   | 0.45  | -0.51 | 3.01  | -0.39 | -0.23 |
| YBX3      | 2.63  | 4.28  | 3.54  | 8.76  | 8.51  |
| AVIL      | 1.34  | 3.02  | 0.60  | 6.85  | 1.26  |
| SPATS2L   | 3.43  | 3.70  | 2.97  | 6.64  | 6.59  |
| ANXA4     | 2.21  | 4.39  | 2.59  | 6.39  | 6.31  |
| POU2F3    | 0.40  | 0.19  | -0.07 | 6.26  | 0.70  |
| LRMP      | 0.44  | 0.28  | 1.14  | 6.08  | 0.55  |
| PLCG2     | 0.20  | 1.93  | 0.44  | 5.72  | 1.53  |
| PLA2G4A   | -0.22 | 0.10  | 0.68  | 4.98  | 1.05  |
| LGALS3    | 1.23  | 1.87  | 1.13  | 4.96  | 4.72  |
| RGS13     | -0.11 | 0.07  | 0.08  | 4.89  | -0.03 |
| BMX       | 0.31  | 0.20  | 0.47  | 4.81  | -0.15 |
| AZGP1     | 0.55  | 2.99  | -0.13 | 4.78  | 1.28  |
| EHF       | 1.54  | 3.04  | -0.78 | 4.75  | 1.61  |
| CRYM      | 1.33  | 3.46  | 0.14  | 4.68  | 1.84  |
| GAL       | 0.68  | 1.01  | 2.72  | 4.37  | 2.20  |
| SOX9      | 3.33  | 2.44  | 1.92  | 3.92  | 3.37  |
| GFI1B     | -0.04 | 0.02  | 0.01  | 3.52  | 0.14  |
| TRIM58    | 0.14  | 0.40  | -0.07 | 3.30  | 1.73  |
| VSNL1     | 0.47  | 0.42  | 1.19  | 2.88  | 0.97  |
| LGALS1    | 1.76  | 4.37  | 2.35  | 2.19  | 11.42 |
| VIM       | 1.83  | 1.45  | 3.71  | 3.84  | 11.02 |
| GSTP1     | 6.06  | 6.71  | 4.65  | 9.23  | 10.31 |
| ANXA1     | 1.18  | 2.27  | 0.80  | 7.01  | 9.55  |
| IFITM3    | 1.15  | 2.80  | 0.64  | 5.09  | 9.07  |
| CNN2      | 1.15  | 2.48  | 2.18  | 3.58  | 8.33  |
| FSTL1     | 3.19  | 0.25  | 3.02  | 1.47  | 8.22  |
| TPM2      | 1.81  | 2.10  | 2.45  | 4.19  | 7.97  |
| YAP1      | 0.69  | 0.18  | 0.31  | 2.80  | 6.62  |
| CRIM1     | 0.15  | 1.82  | 1.54  | 3.34  | 6.57  |
| MRC2      | 0.84  | 0.58  | 2.02  | 0.30  | 6.43  |
| CAV1      | 0.20  | 0.69  | 0.70  | 2.19  | 6.42  |
| GPX8      | 0.58  | 0.12  | 1.46  | 2.16  | 6.31  |
| MAGEA4    | 0.70  | 1.83  | 1.99  | 2.12  | 6.18  |
| MICA      | 0.19  | 0.74  | 0.24  | 1.70  | 6.17  |
| AHNAK     | 0.52  | 1.55  | 0.87  | 3.31  | 6.05  |
| TNFRSF10B | 0.60  | 1.10  | 1.09  | 3.77  | 6.02  |
| OSMR      | 0.07  | 0.88  | 0.23  | 1.86  | 5.80  |
| EMP1      | 0.58  | 0.50  | 0.65  | 1.47  | 5.76  |
| HOXC10    | 1.43  | 2.18  | 2.77  | 4.56  | 5.39  |
| MSRB3     | 0.04  | 0.03  | 0.72  | 0.95  | 5.21  |
| AXL       | -0.06 | 0.12  | 0.18  | 0.70  | 5.05  |
| MYL9      | -0.29 | 0.37  | 0.36  | 1.68  | 4.50  |
| SLPI      | 0.83  | 3.00  | -0.59 | 0.78  | 3.07  |

**Table S10:** Adjusted p-values for bulk archetype signature enrichment for each RPM archetype, related to Figures 5 and S6.

|          | SCLC-A | SCLC-A2 | SCLC-N | SCLC-P | SCLC-Y |
|----------|--------|---------|--------|--------|--------|
| <b>1</b> | 1      | 1       | 1      | 0.0    | 0.0    |

|          |     |     |     |       |     |
|----------|-----|-----|-----|-------|-----|
| <b>2</b> | 1   | 1   | 1   | 0.184 | 1   |
| <b>3</b> | 1   | 1   | 1   | 1     | 0.0 |
| <b>4</b> | 0.0 | 1   | 1   | 1     | 1   |
| <b>5</b> | 1   | 0.0 | 0.0 | 1     | 1   |
| <b>6</b> | 1   | 1   | 1   | 1     | 0.0 |

**Table S11:** Somatic variants in normal tissue and days 4 and 23 of RPM time series.
